# Supplementary material for: Synthesis of zwitterionic, hydrophobic, and amphiphilic polymers via RAFT polymerization induced self-assembly (PISA) in acetic acid
Source: Royal Society of Chemistry journal article supplement (doi:10.1039/c6py01172a), 2016-01-01
Supplement: c6py01172a1.pdf [file c6py01172a1.pdf]

### Supplementary Information

**Batch mode determination  $dn/dc$  determination.** Determination of the  $dn/dc$  value for poly(DMAPS) in 150 mM NaCl polymerized from a poly(HEMA-co-O300) macro-CTA was conducted using a Wyatt Interferometric Refractometer in batch mode over a concentration range of 1.00 to 5.00 mg/mL at a wavelength of 685 nm.

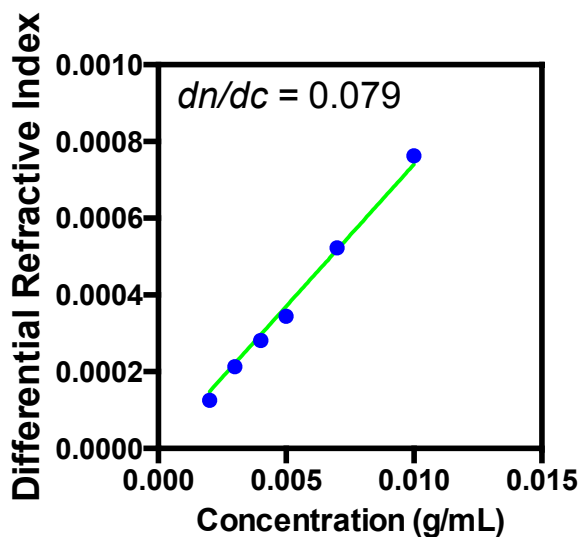

SI Fig. 1. Batch mode determination of the differential refractive index for poly(DMAPS) polymerized from a poly(HEMA-co-O300) macro-CTA. Measurements were conducted in 150 mM NaCl at 685 nm over a concentration range of 1.00-5.00 mg/mL.
